# Supplementary material
Source: Springer Nature journal article supplement (https://www.springerprofessional.de/resource/supplementary/40327_2013_5_MOESM4_ESM.pdf/10801436)

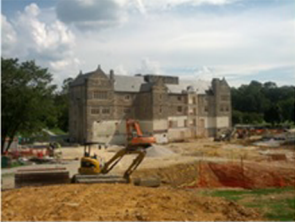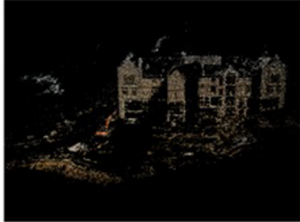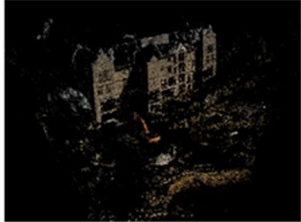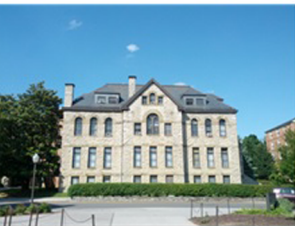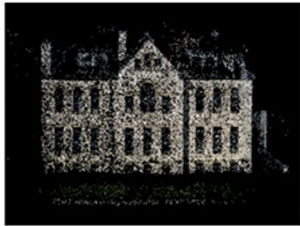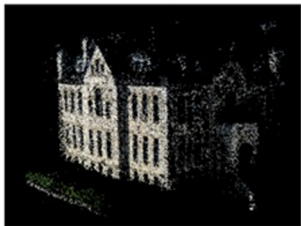

(a)

(b)

Supplement: MOESM4 [file 10801436]
